# Supplementary material for: A NiCo2O4 electrocatalyst with a thin graphitic coating for the anion exchange membrane water electrolysis of wastewater
Source: Royal Society of Chemistry journal article supplement (doi:10.1039/d2ta06474j), 2022-01-01
Supplement: d2ta06474j1.pdf [file d2ta06474j1.pdf]

## Supporting Information

### **A NiCo<sub>2</sub>O<sub>4</sub> electrocatalyst with a thin graphitic coating for anion exchange membrane water electrolysis of wastewater**

Jae-Yeop Jeong,<sup>†a</sup> Yoo Sei Park,<sup>†b</sup> Jaehoon Jeong,<sup>a</sup> Kyung-Bok Lee,<sup>a</sup> Dohyung Kim,<sup>a</sup> Ki-Yong Yoon,<sup>a</sup> Han-Seam Park,<sup>c</sup> Juchan Yang<sup>\*a</sup>

<sup>a</sup> Department of Hydrogen Energy Materials, Surface & Nano Materials Division, Korea Institute of Materials Science (KIMS), Changwon, 51508, Republic of Korea

<sup>b</sup> Department of Advanced Material Engineering, Chungbuk National University, Chungdae-ro 1, Seowon-Gu, Cheongju, Chungbuk, 28644 Republic of Korea

<sup>c</sup> Mobility & IT Battery Division, LG Energy Solution, Daejeon, 34112, Republic of Korea

<sup>†</sup>These authors have contributed equally.

\*Corresponding author

E-mail: jcyang@kims.re.kr (Dr. J.Y)

Keywords: electrocatalyst, carbon coating, waste water, hydrogen production, anion exchange membrane water electrolysis

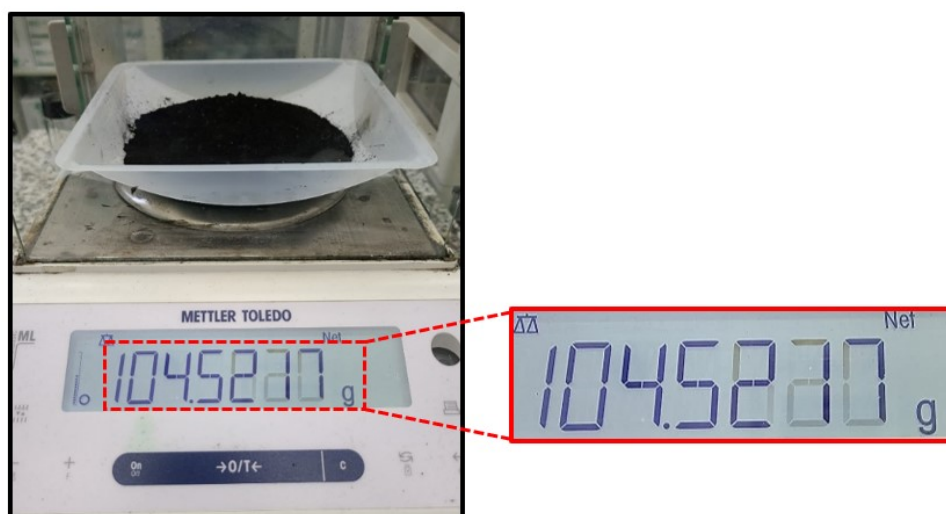

**Fig. S1.** The photograph of weighing results of obtained electrocatalyst in the synthesis process.

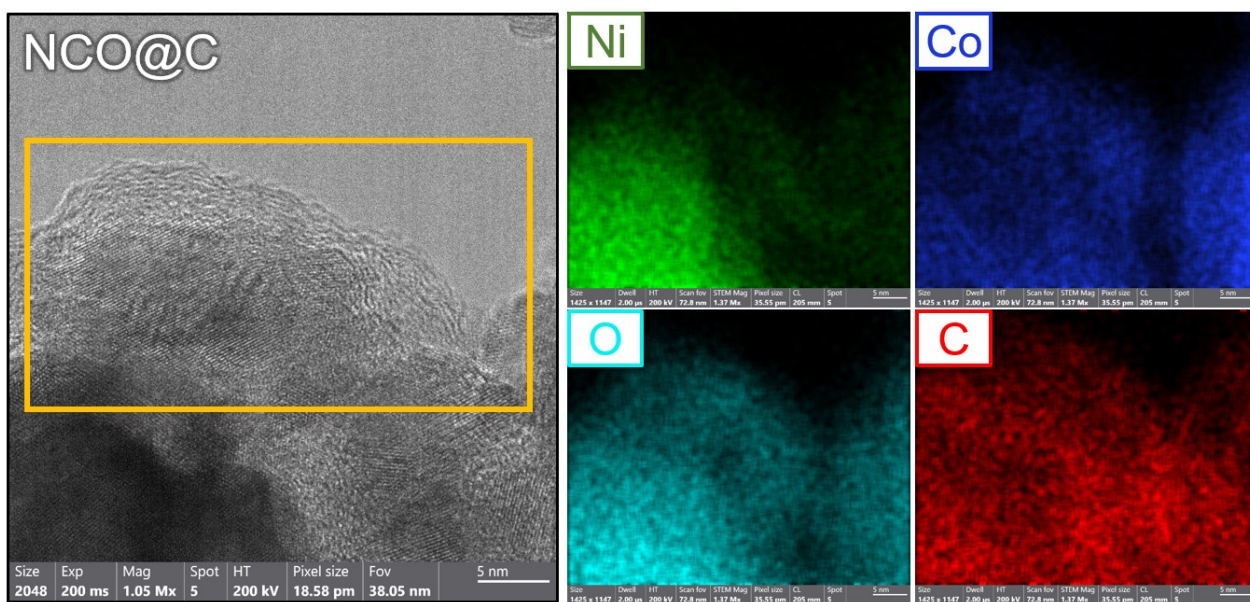

**Fig. S2.** Energy-dispersive spectroscopic mapping of NCO@C for elemental Ni, Co, O and C.

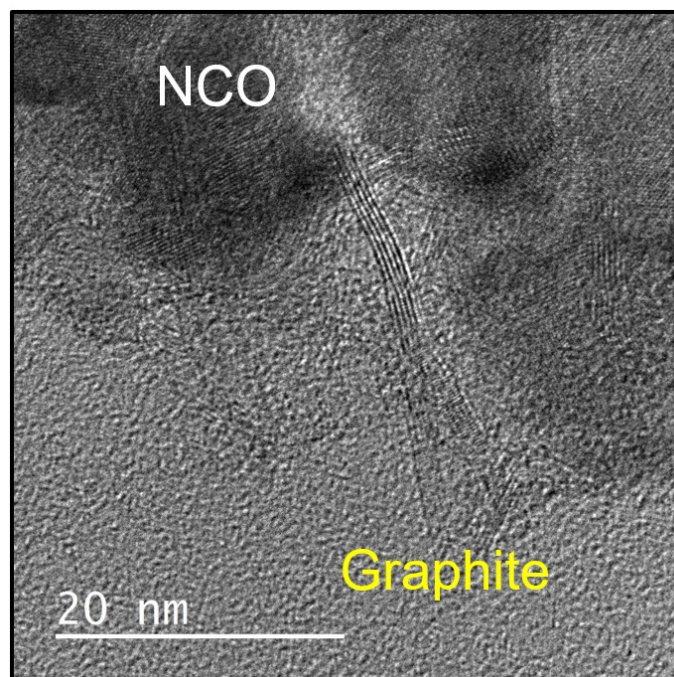

**Fig. S3.** TEM image of physically mixed NCO and graphite without ball-milling process.

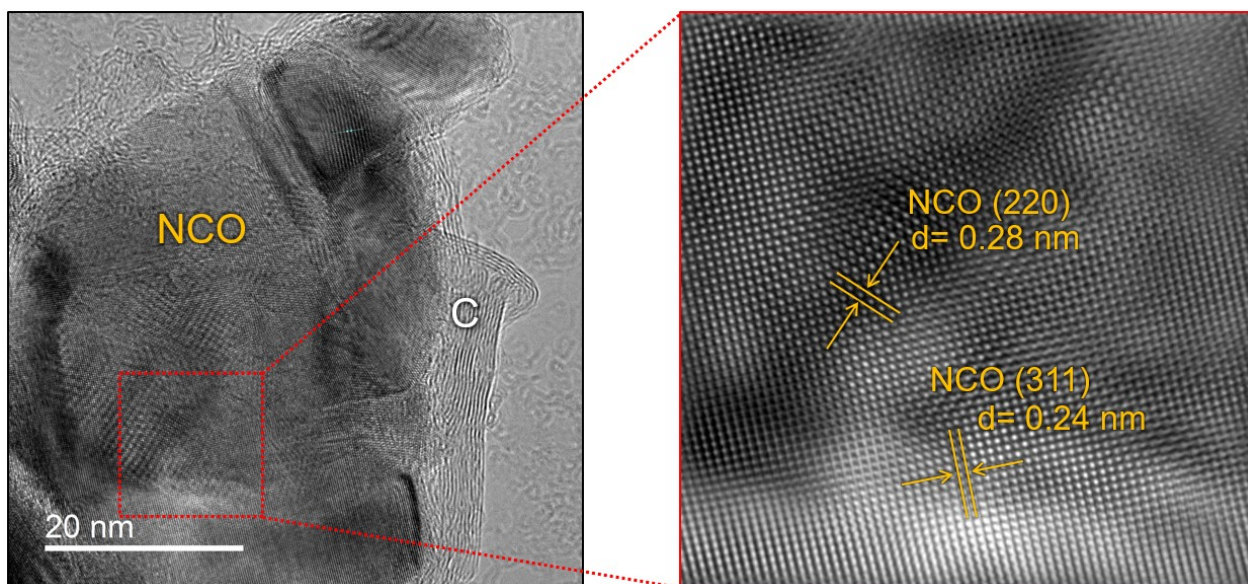

**Fig. S4.** TEM image of NCO@C. High resolution TEM image (right) taken from red part in NCO@C low magnification image (left). (NCO: NiCo<sub>2</sub>O<sub>4</sub>)

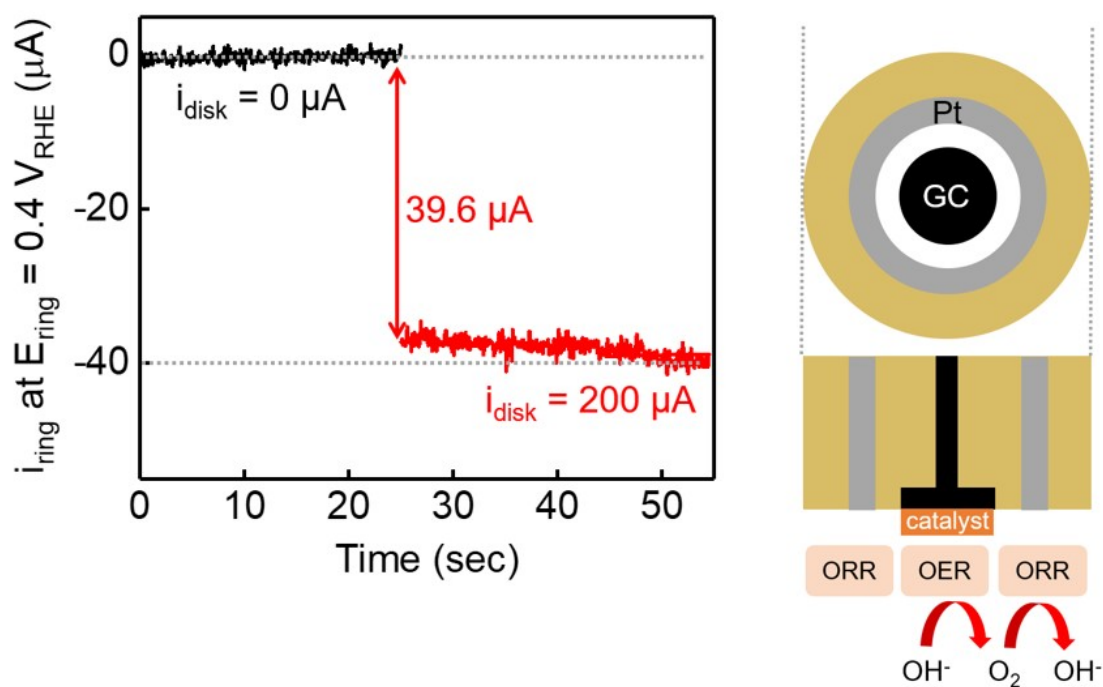

**Fig. S5.** RRDE testing of NCO@C for OER Faradaic efficiency (FE) in 0.1 M KOH solution. The schematic illustration (right) of using RRDE to measure the FE. OER process in GC disk electrode generates oxygen ( $4\text{OH}^- \rightarrow \text{O}_2 + 4\text{e}^- + 2\text{H}_2\text{O}$ ), which is reduced by oxygen reduction reaction (ORR) at Pt ring electrode. The ring potential of  $0.4 V_{\text{RHE}}$  was applied to reduce the generated oxygen, and OER in the disk electrode and ORR in the ring electrode occur successively. The FE was calculated as follow equation.

$$\text{FE} = I_{\text{ring}} / (I_{\text{disk}} \cdot N)$$

Where  $I_{\text{disk}}$  and  $I_{\text{ring}}$  are the disk and ring current, respectively.  $N$  represents the current collection efficiency of the Pt ring with the value of 0.2.

## single cell components

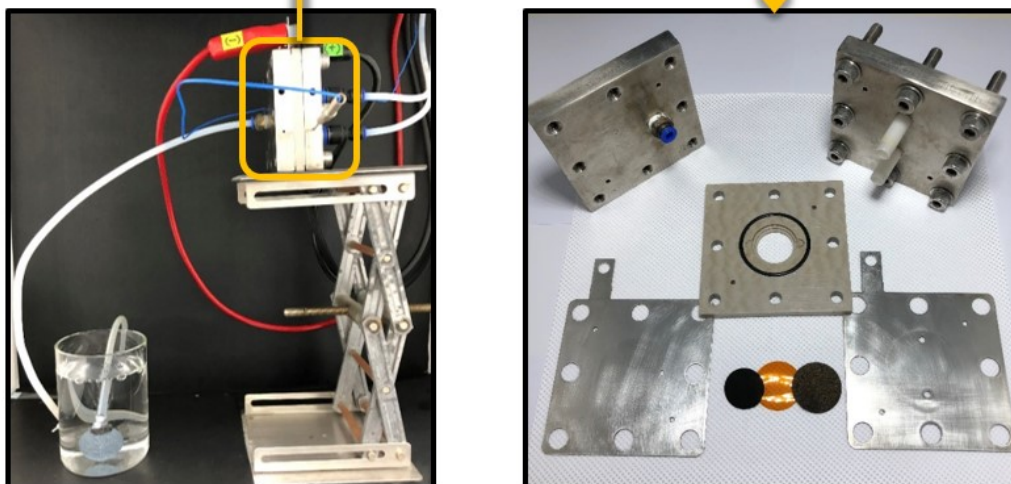

**Fig. S6.** The photograph of the AEMWE single cell operation (left) and unit configuration (right). The configuration of single cell is as follows: cathode || AEM || anode.

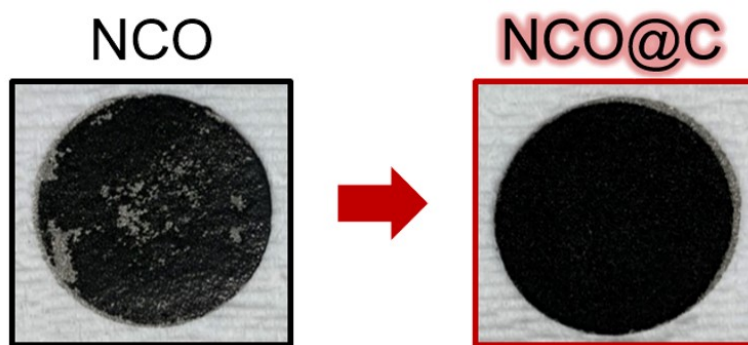

**Fig. S7.** Comparison of the surface of electrode with the same amount of synthetic electrocatalyst. On the electrode surface to which the NCO@C catalyst is applied, the carbon coating effect shows a uniform electrode surface.



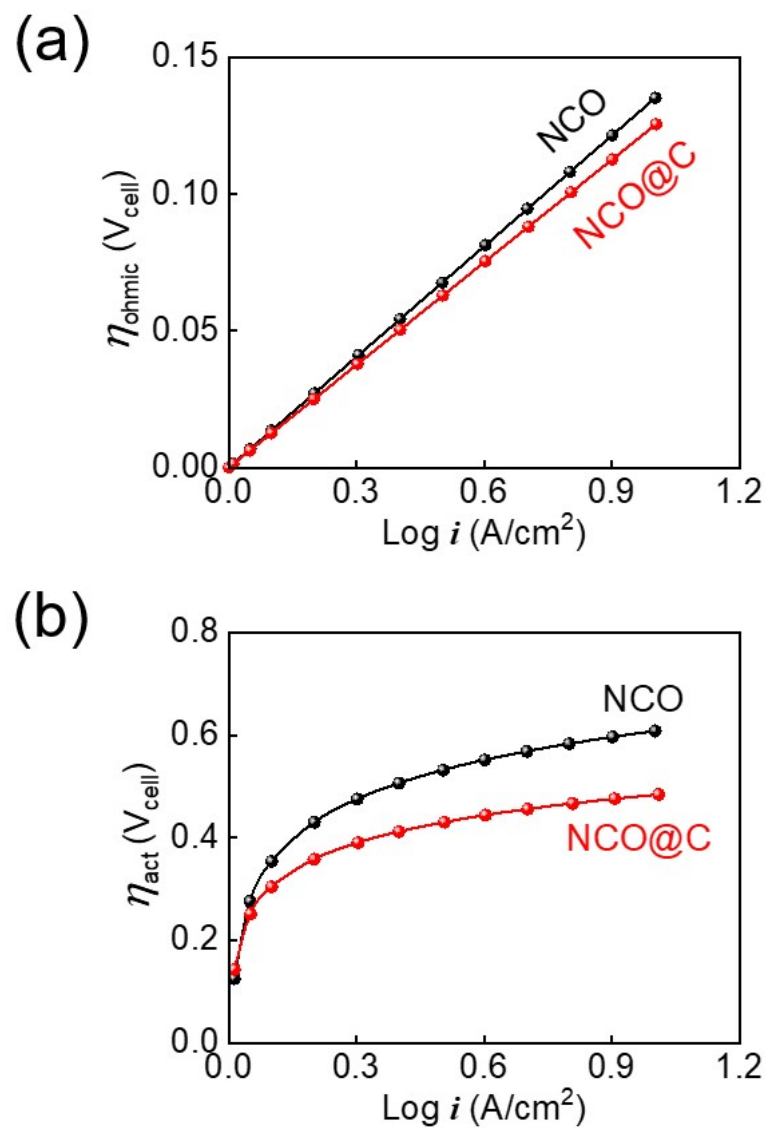

**Fig. S8.** The overpotential of AEMWE with NCO@C and NCO as anode was subdivided into (a) ohmic overpotential ( $\eta_{\text{ohmic}}$ ) and (b) activation overpotential ( $\eta_{\text{act}}$ ) at various current density regions.

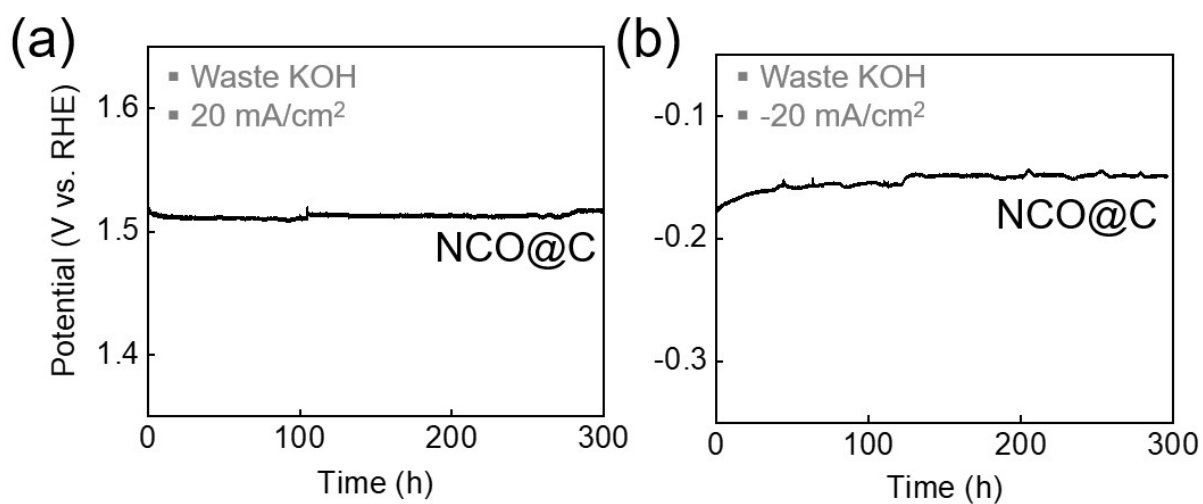

**Fig. S9.** Continuous long-term durability test of NCO@C electrocatalyst at 20 mA/cm<sup>2</sup> for OER (a) and -20 mA/cm<sup>2</sup> for HER (b) in waste KOH electrolyte.

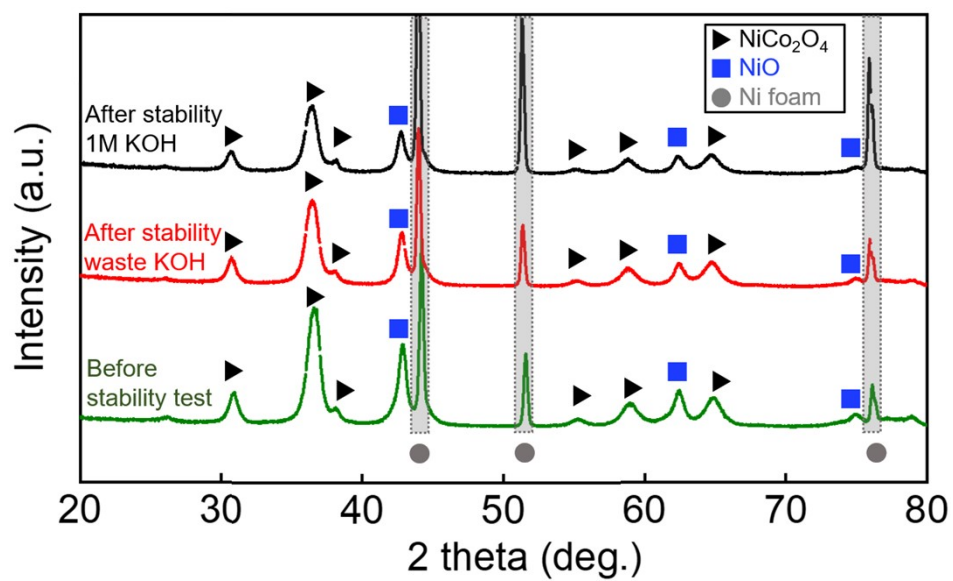

**Fig. S10.** XRD patterns of anode electrode applied NCO@C before and after durability test.

**Table S1.** Comparison of the performance of AEMWE single cell by non-precious electrocatalyst as anode and cathode.

| Cathode                                                    | Anode                                                | Electrolyte | Temperature (°C) | Performance                                      | Reference |
|------------------------------------------------------------|------------------------------------------------------|-------------|------------------|--------------------------------------------------|-----------|
| NiCo <sub>2</sub> O <sub>4</sub>                           | NiCo <sub>2</sub> O <sub>4</sub>                     | 1M KOH      | 50               | 0.764 A/cm <sup>2</sup> at 1.9 V <sub>cell</sub> | This work |
| NiCo <sub>2</sub> O <sub>4</sub>                           | NiCo <sub>2</sub> O <sub>4</sub>                     | Waste KOH   | 50               | 0.923 A/cm <sup>2</sup> at 1.9 V <sub>cell</sub> | This work |
| NiFeCoP                                                    | NiFeCo-LDH                                           | 1M KOH      | 50               | 0.5 A/cm <sup>2</sup> at 1.75 V <sub>cell</sub>  | 1         |
| NiCo/NiCoO                                                 | CuCo <sub>2</sub> O <sub>4</sub>                     | 1M KOH      | 50               | 0.5 A/cm <sup>2</sup> at 1.85 V <sub>cell</sub>  | 2         |
| Co <sub>3</sub> S <sub>4</sub>                             | Cu <sub>0.81</sub> Co <sub>2.19</sub> O <sub>4</sub> | 1M KOH      | 60               | 0.431 A/cm <sup>2</sup> at 2 V <sub>cell</sub>   | 3         |
| CoP                                                        | CoP                                                  | DI water    | 50               | 0.335 A/cm <sup>2</sup> at 1.8 V <sub>cell</sub> | 4         |
| Ni/CeO <sub>2</sub> -<br>La <sub>2</sub> O <sub>3</sub> /C | CuCoO <sub>x</sub>                                   | 0.1M NaOH   | 70               | 0.208 A/cm <sup>2</sup> at 2.2 V <sub>cell</sub> | 5         |
| Ni                                                         | Ce <sub>0.2</sub> MnFe <sub>1.8</sub> O <sub>4</sub> | 1M KOH      | 25               | 0.3 A/cm <sup>2</sup> at 1.8 V <sub>cell</sub>   | 6         |
| Ni/CeO <sub>2</sub> -<br>La <sub>2</sub> O <sub>3</sub> /C | CuCoO <sub>x</sub>                                   | 1M KOH      | 43               | 0.47 A/cm <sup>2</sup> at 1.9 V <sub>cell</sub>  | 7         |
| Ni                                                         | Ni                                                   | 1M KOH      | 50               | 0.15 A/cm <sup>2</sup> at 1.9 V <sub>cell</sub>  | 8         |
| Ni                                                         | Li <sub>0.21</sub> Co <sub>2.79</sub> O <sub>4</sub> | DI water    | 45               | 0.3 A/cm <sup>2</sup> at 2.05 V <sub>cell</sub>  | 9         |
| Ni                                                         | Cu <sub>0.7</sub> Co <sub>2.3</sub> O <sub>4</sub>   | 1M KOH      | 55               | 0.1 A/cm <sup>2</sup> at 1.99 V <sub>cell</sub>  | 10        |
| NiMo                                                       | NiFe                                                 | DI water    | 70               | 0.4 A/cm <sup>2</sup> at 1.85 V <sub>cell</sub>  | 11        |
| Ni                                                         | Cu <sub>0.7</sub> Co <sub>2.3</sub> O <sub>4</sub>   | DI water    | 22               | 0.1 A/cm <sup>2</sup> at 1.9 V <sub>cell</sub>   | 12        |

**Reference for table S1.**

1. J. Lee, H. Jung, Y. S. Park, N. Kwon, S. Woo, N. C. S. Selvam, G. S. Han, H. S. Jung, P. J. Yoo, S. M. Choi, J. W. Han and B. Lim, *Applied Catalysis B: Environmental*, 2021, 294, 120246.
2. Y. S. Park, J. Jeong, Y. Noh, M. J. Jang, J. Lee, K. H. Lee, D. C. Lim, M. H. Seo, W. B. Kim, J. Yang and S. M. Choi, *Applied Catalysis B: Environmental*, 2021, 292, 120170.
3. Y. S. Park, J. H. Lee, M. J. Jang, J. Jeong, S. M. Park, W.-S. Choi, Y. Kim, J. Yang and S. M. Choi, *International Journal of Hydrogen Energy*, 2020, 45, 36-45.
4. J. Chang, L. Liang, C. Li, M. Wang, J. Ge, C. Liu and W. Xing, *Green Chemistry*, 2016, 18, 2287-2295.
5. L. Zeng and T. S. Zhao, *Nano Energy*, 2015, 11, 110-118.

6. T. Pandiarajan, L. John Berchmans and S. Ravichandran, *RSC Advances*, 2015, 5, 34100-34108.
7. C. C. Pavel, F. Cecconi, C. Emiliani, S. Santiccioli, A. Scaffidi, S. Catanorchi and M. Comotti, *Angewandte Chemie International Edition*, 2014, 53, 1378-1381.
8. S. H. Ahn, B.-S. Lee, I. Choi, S. J. Yoo, H.-J. Kim, E. Cho, D. Henkensmeier, S. W. Nam, S.-K. Kim and J. H. Jang, *Applied Catalysis B: Environmental*, 2014, 154-155, 197-205.
9. X. Wu and K. Scott, *International Journal of Hydrogen Energy*, 2013, 38, 3123-3129.
10. Y.-C. Cao, X. Wu and K. Scott, *International Journal of Hydrogen Energy*, 2012, 37, 9524-9528.
11. L. Xiao, S. Zhang, J. Pan, C. Yang, M. He, L. Zhuang and J. Lu, *Energy & Environmental Science*, 2012, 5, 7869-7871.
12. X. Wu and K. Scott, *Journal of Power Sources*, 2012, 214, 124-129.
